# Supplementary material for: Soil organic matter interactions along the elevation gradient of the James Ross Island (Antarctica)
Source: Copernicus journal article supplement (doi:10.5194/soil-10-813-2024), 2024-11-19
Supplement: Supplementary file 1 [file soil-10-813-2024-supplement.zip]

## Sheet: Stanovení_polyfenolů
Vzorek	mčaj (g)	Amax	c (mg∙dm−3)	c (mg∙dm−3)	c (mg∙g−1)	Vzorek (čaj)	c (mg∙g−1)	±δ	100
19A	0.10545	0.1551	81.6316	816.3	77.4111	19	78.7828	8.54015
19B	0.09892	0.1689	88.8947	888.9	89.8605
19C	0.10995	0.1443	75.9474	759.5	69.0769
20A	0.09725	0.447	235.263	235.263	24.1916	20	25.1152	0.996456
20B	0.10646	0.536	282.105	282.105	26.4987
20C	0.10887	0.51	268.421	268.421	24.6552
35A	0.10295	0.146	76.8421	76.8421	7.46402	35	8.45699	0.810247
35B	0.09396	0.151	79.4737	79.4737	8.45825
35C	0.09358	0.168	88.4211	88.4211	9.44871
36A	0.1055	0.443	233.158	233.158	22.1003	36	17.5102	6.49283
36B	0.09025	0.379	199.474	199.474	22.1023
36C	0.10491	0.166	87.3684	87.3684	8.32794
37A	0.09815	0.1458	76.7368	767.4	78.1864	37	103.044	25.013
37B	0.08742	0.228	120	1200	137.268
37C	0.11181	0.199	104.737	1047.4	93.6768
38A	0.09392	0.068	35.7895	35.7895	3.81063	38	3.54949	0.261778
38B	0.10393	0.072	37.8947	37.8947	3.64618
38C	0.10224	0.062	32.6316	32.6316	3.19166
39A	0.09885	0.053	27.8947	27.8947	2.82193	39	2.61597	0.211983
39B	0.10869	0.048	25.2632	25.2632	2.32433
39C	0.11494	0.059	31.0526	31.0526	2.70164
40A	0.10142	0.32	168.421	168.421	16.6063	40	16.9218	0.294562
40B	0.1078	0.345	181.579	181.579	16.8441
40C	0.09818	0.323	170	170	17.3151
41A	0.10725	0.2007	105.632	1056.3	98.4895	41	87.5116	7.98336
41B	0.10756	0.1723	90.6842	906.8	84.3064
41C	0.10878	0.1648	86.7368	867.4	79.7389
42A	0.1059	0.052	27.3684	27.3684	2.58436	42	2.64977	0.177566
42B	0.09579	0.045	23.6842	23.6842	2.47251
42C	0.09644	0.053	27.8947	27.8947	2.89244
rovnice
y=0,0019x (mg∙dm−3)
0.0019
10× zředěno

## Sheet: Stanovení_vodou_extrh.l.
Vzorek	mzkumavka (g)	mzkumavka + vzorek (g)	mvzorek (g)	mvzorek (mg)	c (mg∙g−1)	Vzorek (čaj)	c (mg∙g−1)	±δ
19A	3.65832	3.68545	0.02713	27.13	7.41597	19	8.88221	1.04028
19B	3.7306	3.76686	0.03626	36.26	9.71962
19C	3.73355	3.76906	0.03551	35.51	9.51106
20A	3.71376	3.7288	0.01504	15.04	4.0498	20	4.24194	1.09037
20B	3.65749	3.66851	0.01102	11.02	3.013
20C	3.9855	4.00807	0.02257	22.57	5.66303
35A	3.72537	3.72955	0.00418	4.18	1.12204	35	0.985543	0.102336
35B	4.3169	4.32068	0.00378	3.78	0.875628
35C	3.72277	3.72634	0.00357	3.57	0.958963
36A	3.72589	3.73148	0.00559	5.59	1.50031	36	1.23936	0.187958
36B	3.73043	3.73473	0.0043	4.3	1.15268
36C	3.72744	3.73141	0.00397	3.97	1.06507
37A	3.73012	3.74789	0.01777	17.77	4.76392	37	5.3878	0.455928
37B	3.77006	3.79208	0.02202	22.02	5.84076
37C	3.72567	3.74638	0.02071	20.71	5.55873
38A	3.72215	3.72436	0.00221	2.21	0.593743	38	0.594088	0.10952
38B	3.78915	3.79191	0.00276	2.76	0.728396
38C	3.6077	3.60936	0.00166	1.66	0.460127
39A	4.31435	4.31594	0.00159	1.59	0.368538	39	0.410719	0.109404
39B	3.73067	3.7318	0.00113	1.13	0.302895
39C	3.72731	3.7294	0.00209	2.09	0.560726
40A	3.72827	3.73453	0.00626	6.26	1.67906	40	2.02272	0.304107
40B	3.72472	3.73206	0.00734	7.34	1.97062
40C	3.77096	3.78008	0.00912	9.12	2.41848
41A	3.63566	3.66033	0.02467	24.67	6.78556	41	6.6341	0.207184
41B	3.66168	3.68649	0.02481	24.81	6.77558
41C	3.78007	3.80404	0.02397	23.97	6.34115
42A	3.7354	3.74042	0.00502	5.02	1.3439	42	1.12301	0.301001
42B	3.78529	3.78793	0.00264	2.64	0.697437
42C	3.73577	3.74073	0.00496	4.96	1.3277
1000
1
