# Supplementary material for: Soil organic matter interactions along the elevation gradient of the James Ross Island (Antarctica)
Source: Copernicus journal article supplement (doi:10.5194/soil-10-813-2024), 2024-11-19

Sample: 24 air  
Size: 21.6200 mg  
Method: 24 air  
Comment: 24 air

# TGA

File: C:\...\TGA\A Mendelu\19-42\24 air.001

Run Date: 19-Nov-2020 12:34

Instrument: TGA Q5000 V3.17 Build 265

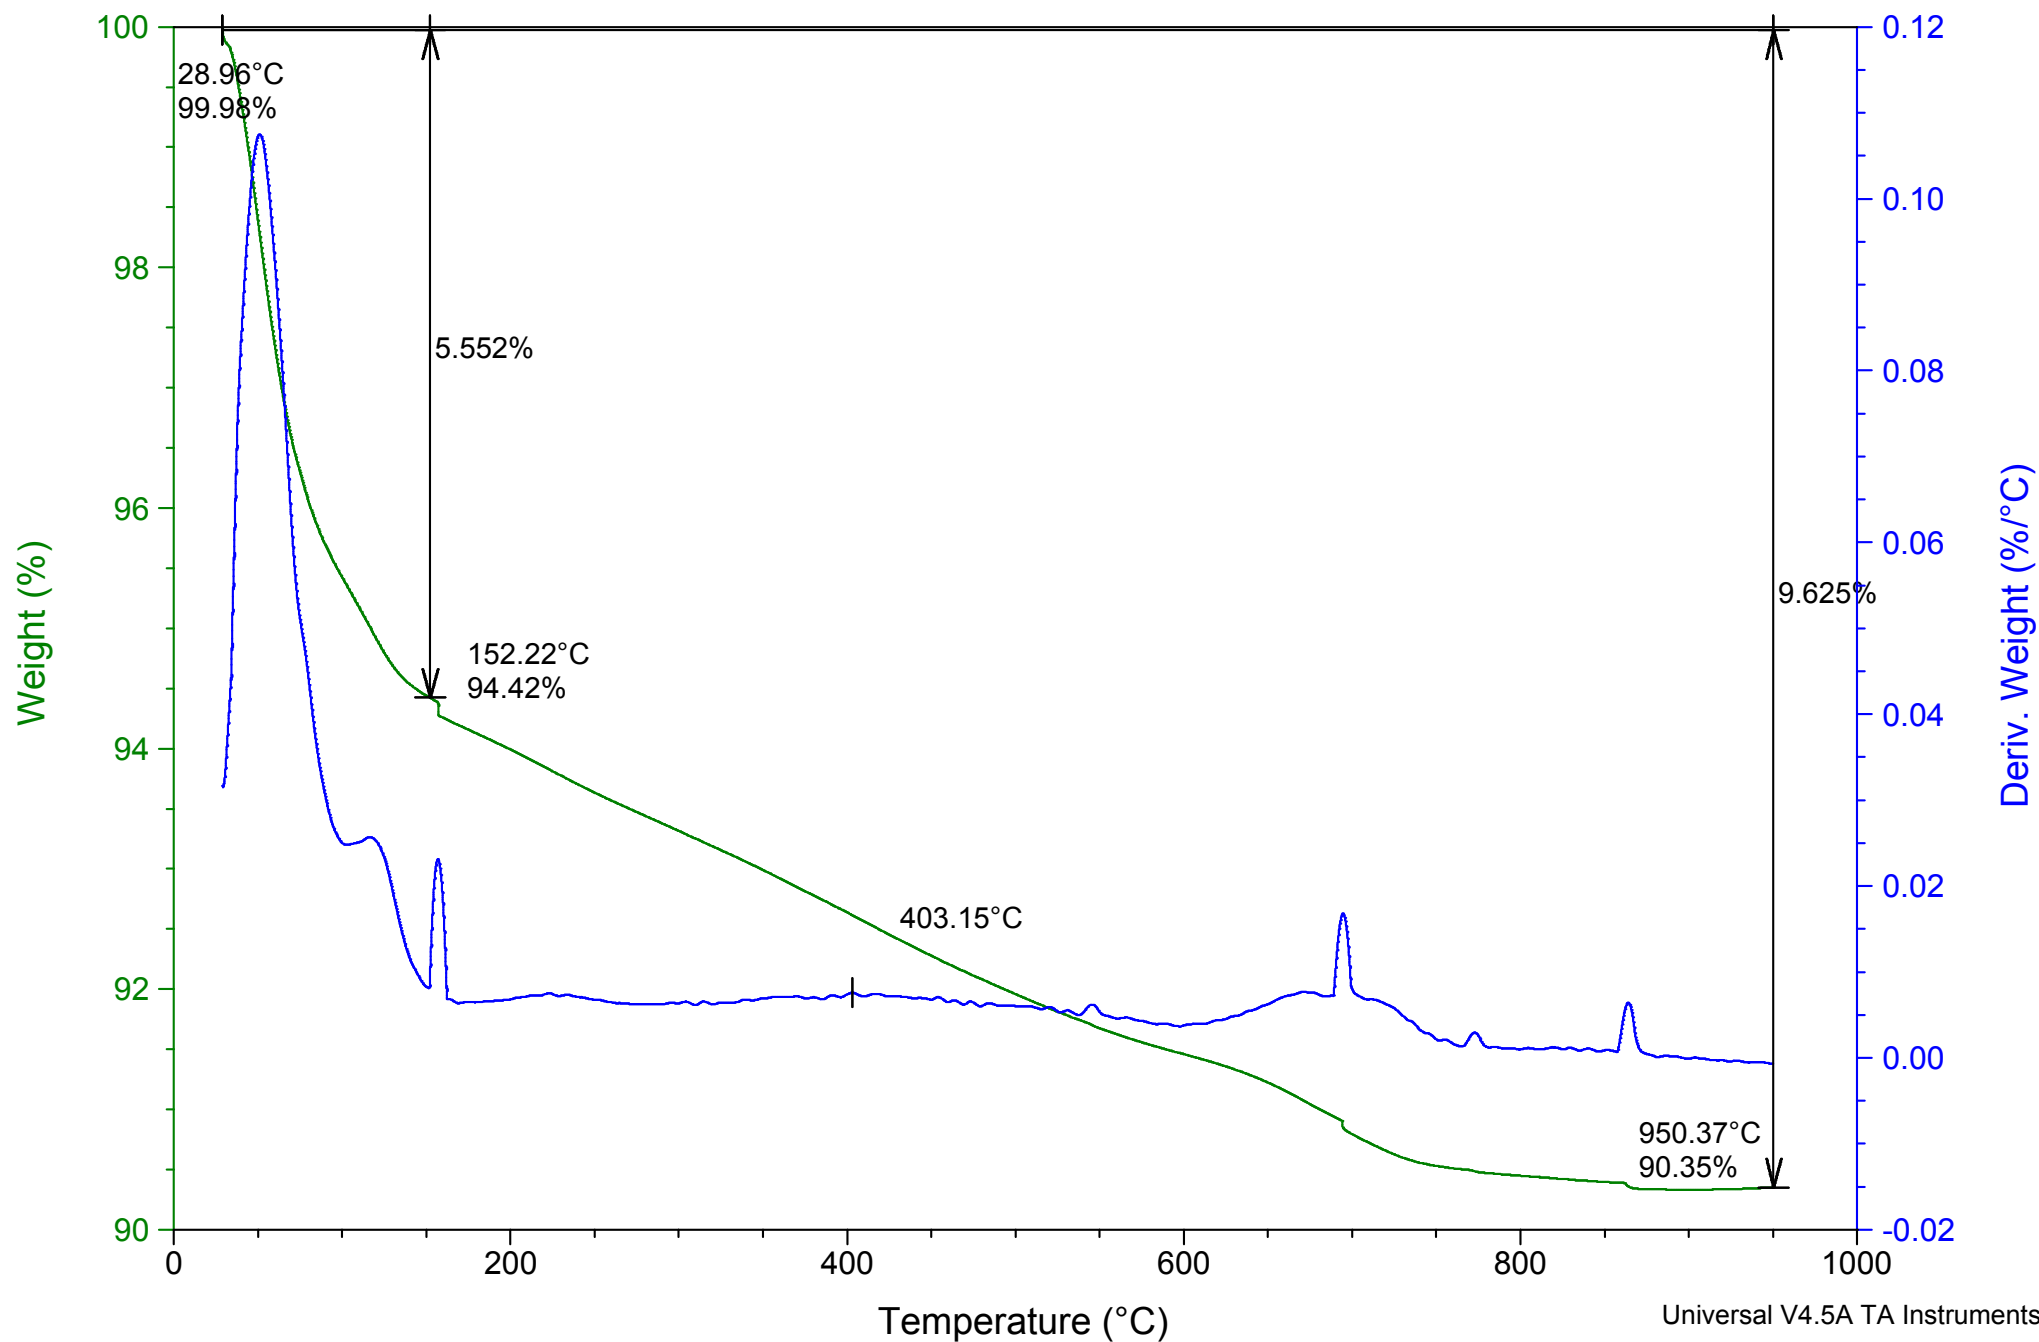

Supplement: Supplementary file 4 [file soil-10-813-2024-supplement.zip]
