# Supplementary material for: Soil organic matter interactions along the elevation gradient of the James Ross Island (Antarctica)
Source: Copernicus journal article supplement (doi:10.5194/soil-10-813-2024), 2024-11-19

Sample: 37 N  
Size: 24.6930 mg  
Method: 37 N  
Comment: 37 N

# TGA

File: C:\...\Enev\TGAI\A Mendelu\19-42\37 N.001

Run Date: 02-Dec-2020 08:54

Instrument: TGA Q50 V20.13 Build 39

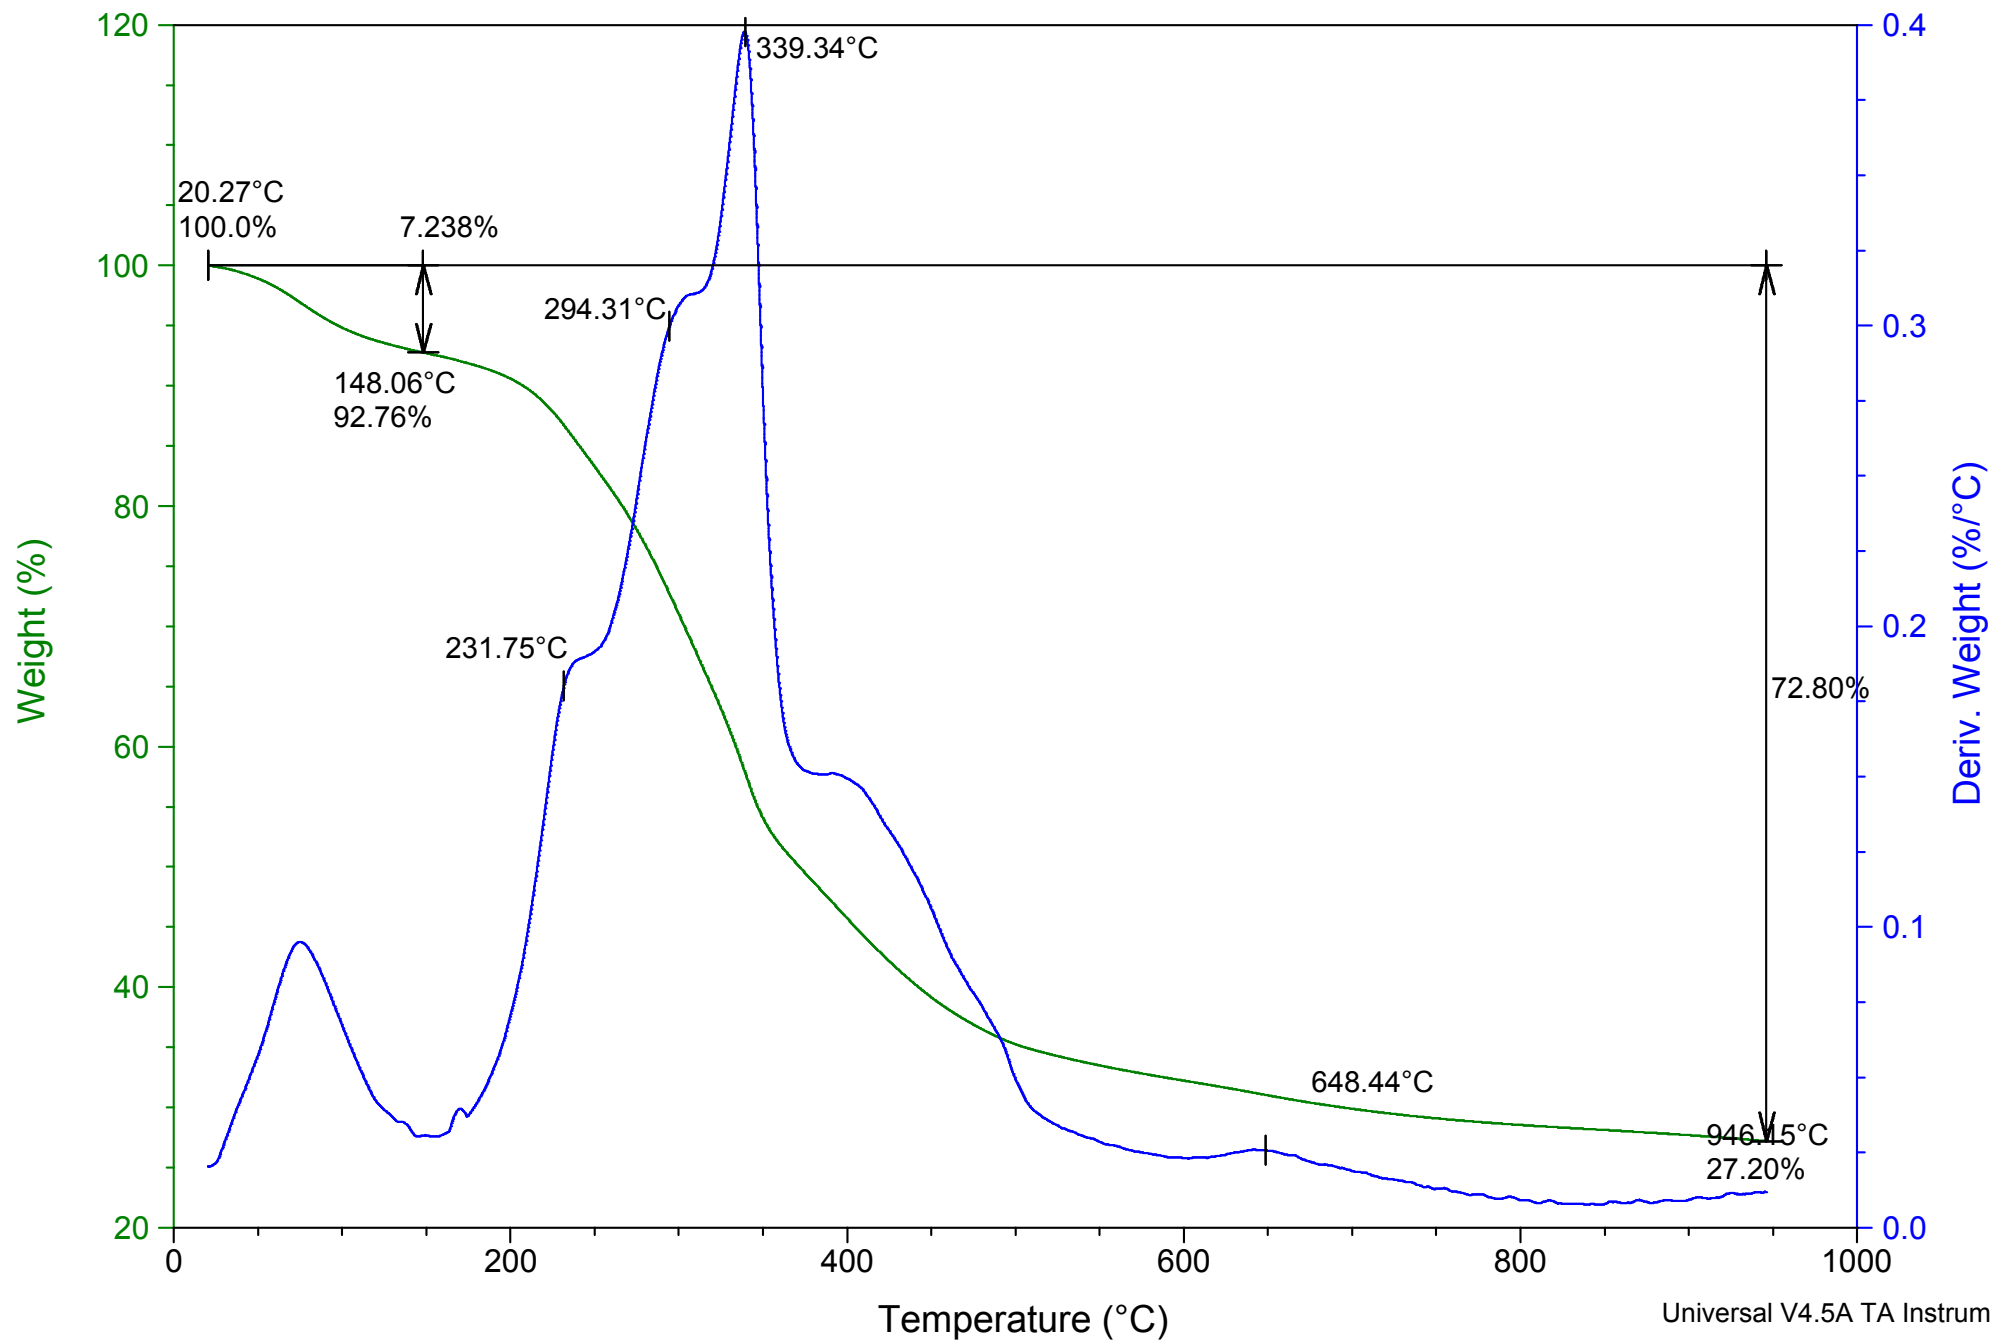

Supplement: Supplementary file 7 [file soil-10-813-2024-supplement.zip]
