# Supplementary material for: Soil organic matter interactions along the elevation gradient of the James Ross Island (Antarctica)
Source: Copernicus journal article supplement (doi:10.5194/soil-10-813-2024), 2024-11-19

Sample: 34 N  
Size: 34.7060 mg  
Method: 34 N  
Comment: 34 N

# TGA

File: C:\...\Enev\TGAI\A Mendelu\19-42\34 N.001

Run Date: 30-Nov-2020 10:34

Instrument: TGA Q50 V20.13 Build 39

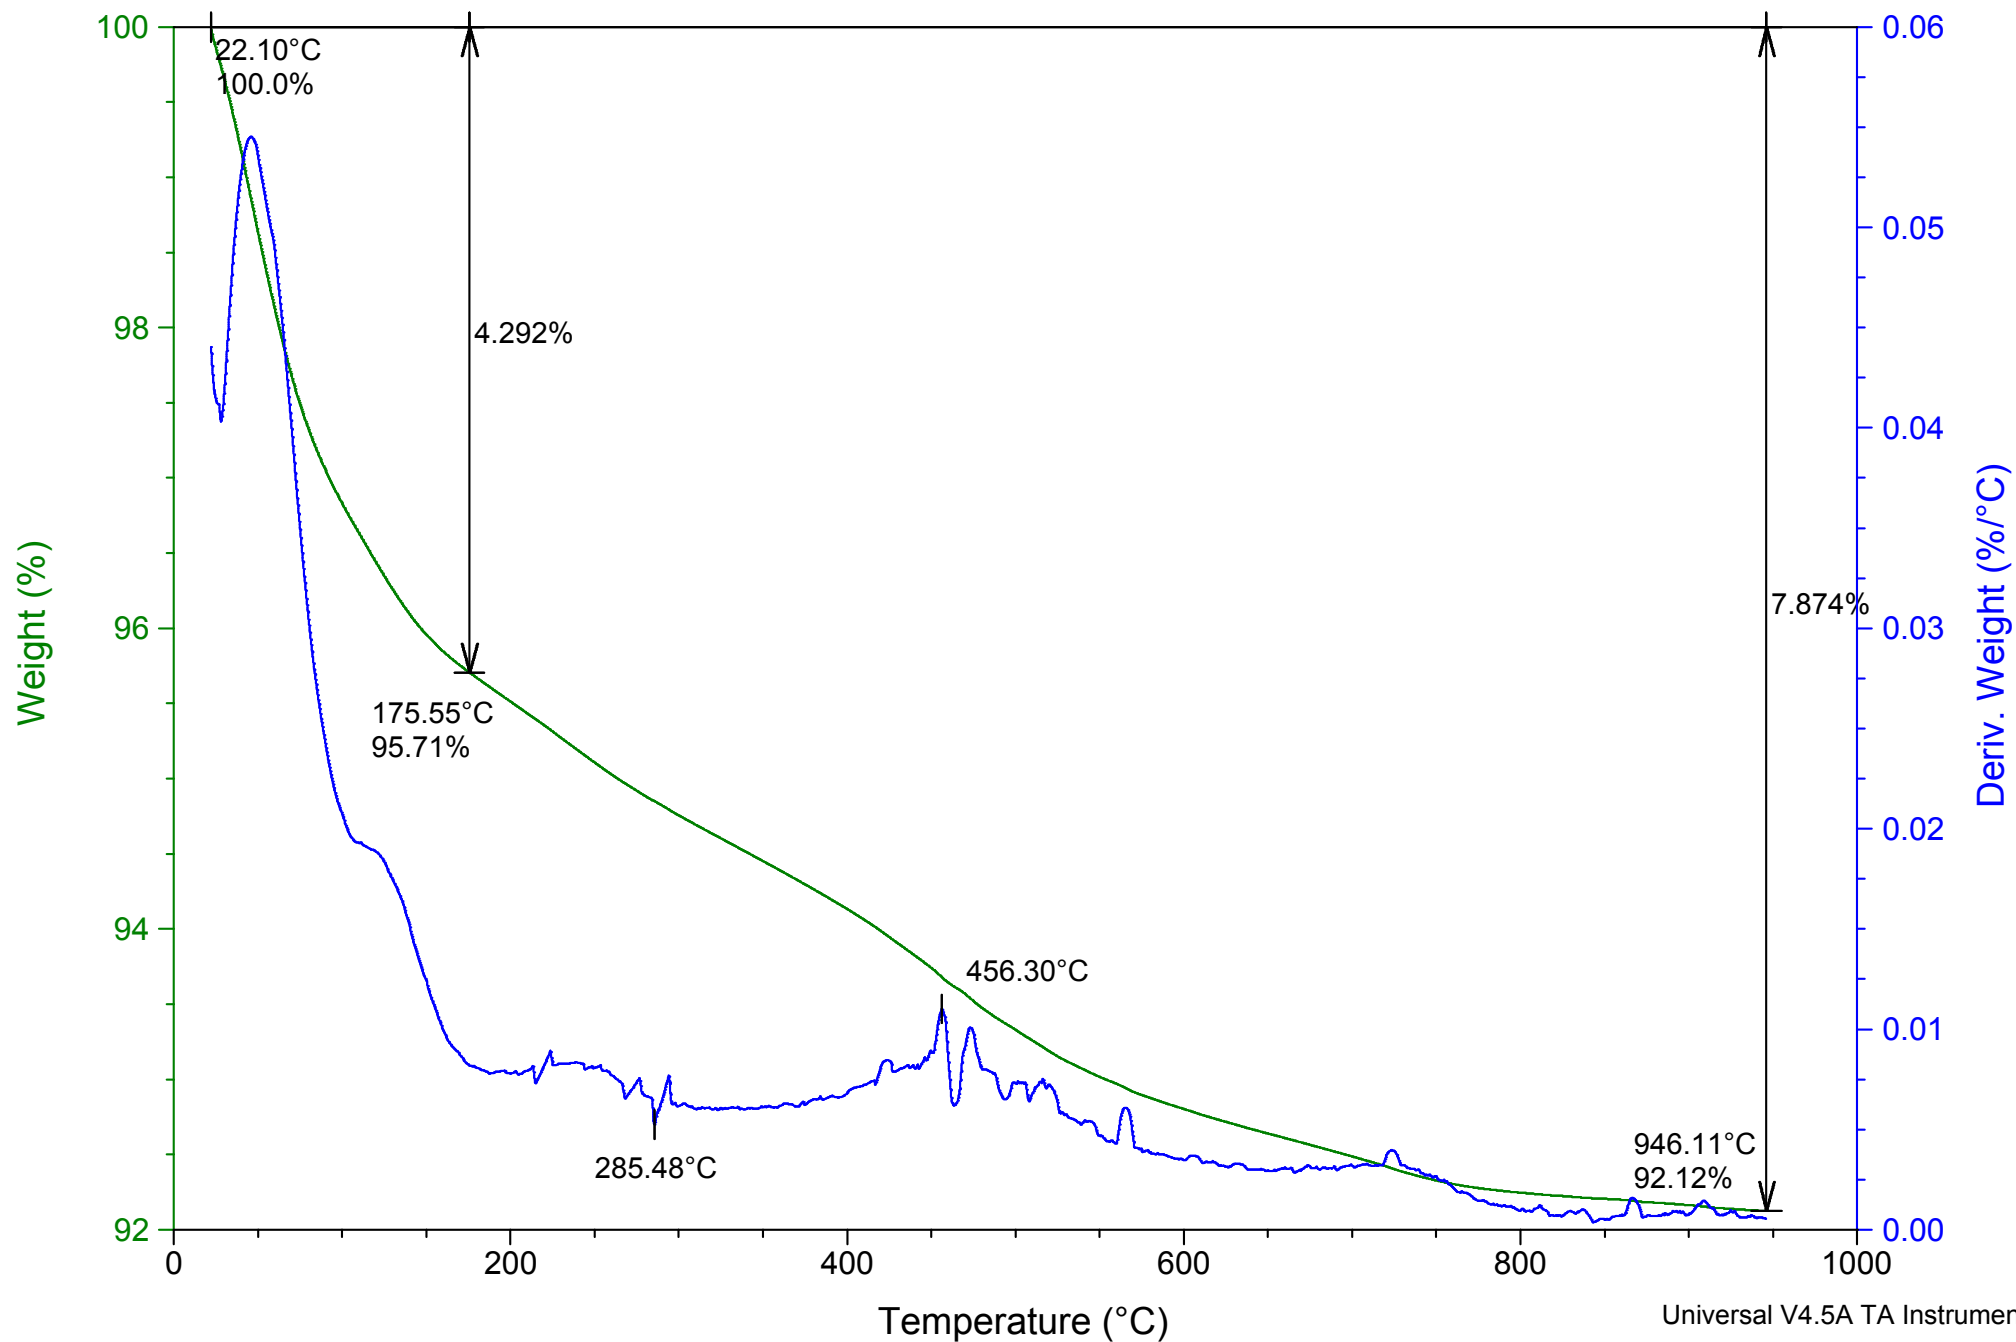

Supplement: Supplementary file 21 [file soil-10-813-2024-supplement.zip]
