# Supplementary material for: Soil organic matter interactions along the elevation gradient of the James Ross Island (Antarctica)
Source: Copernicus journal article supplement (doi:10.5194/soil-10-813-2024), 2024-11-19

Sample: 22 air  
Size: 19.4520 mg  
Method: 22 air  
Comment: 22 air

# TGA

File: C:\...\TGA\A Mendelu\19-42\22 air.001

Run Date: 18-Nov-2020 12:35

Instrument: TGA Q50 V20.13 Build 39

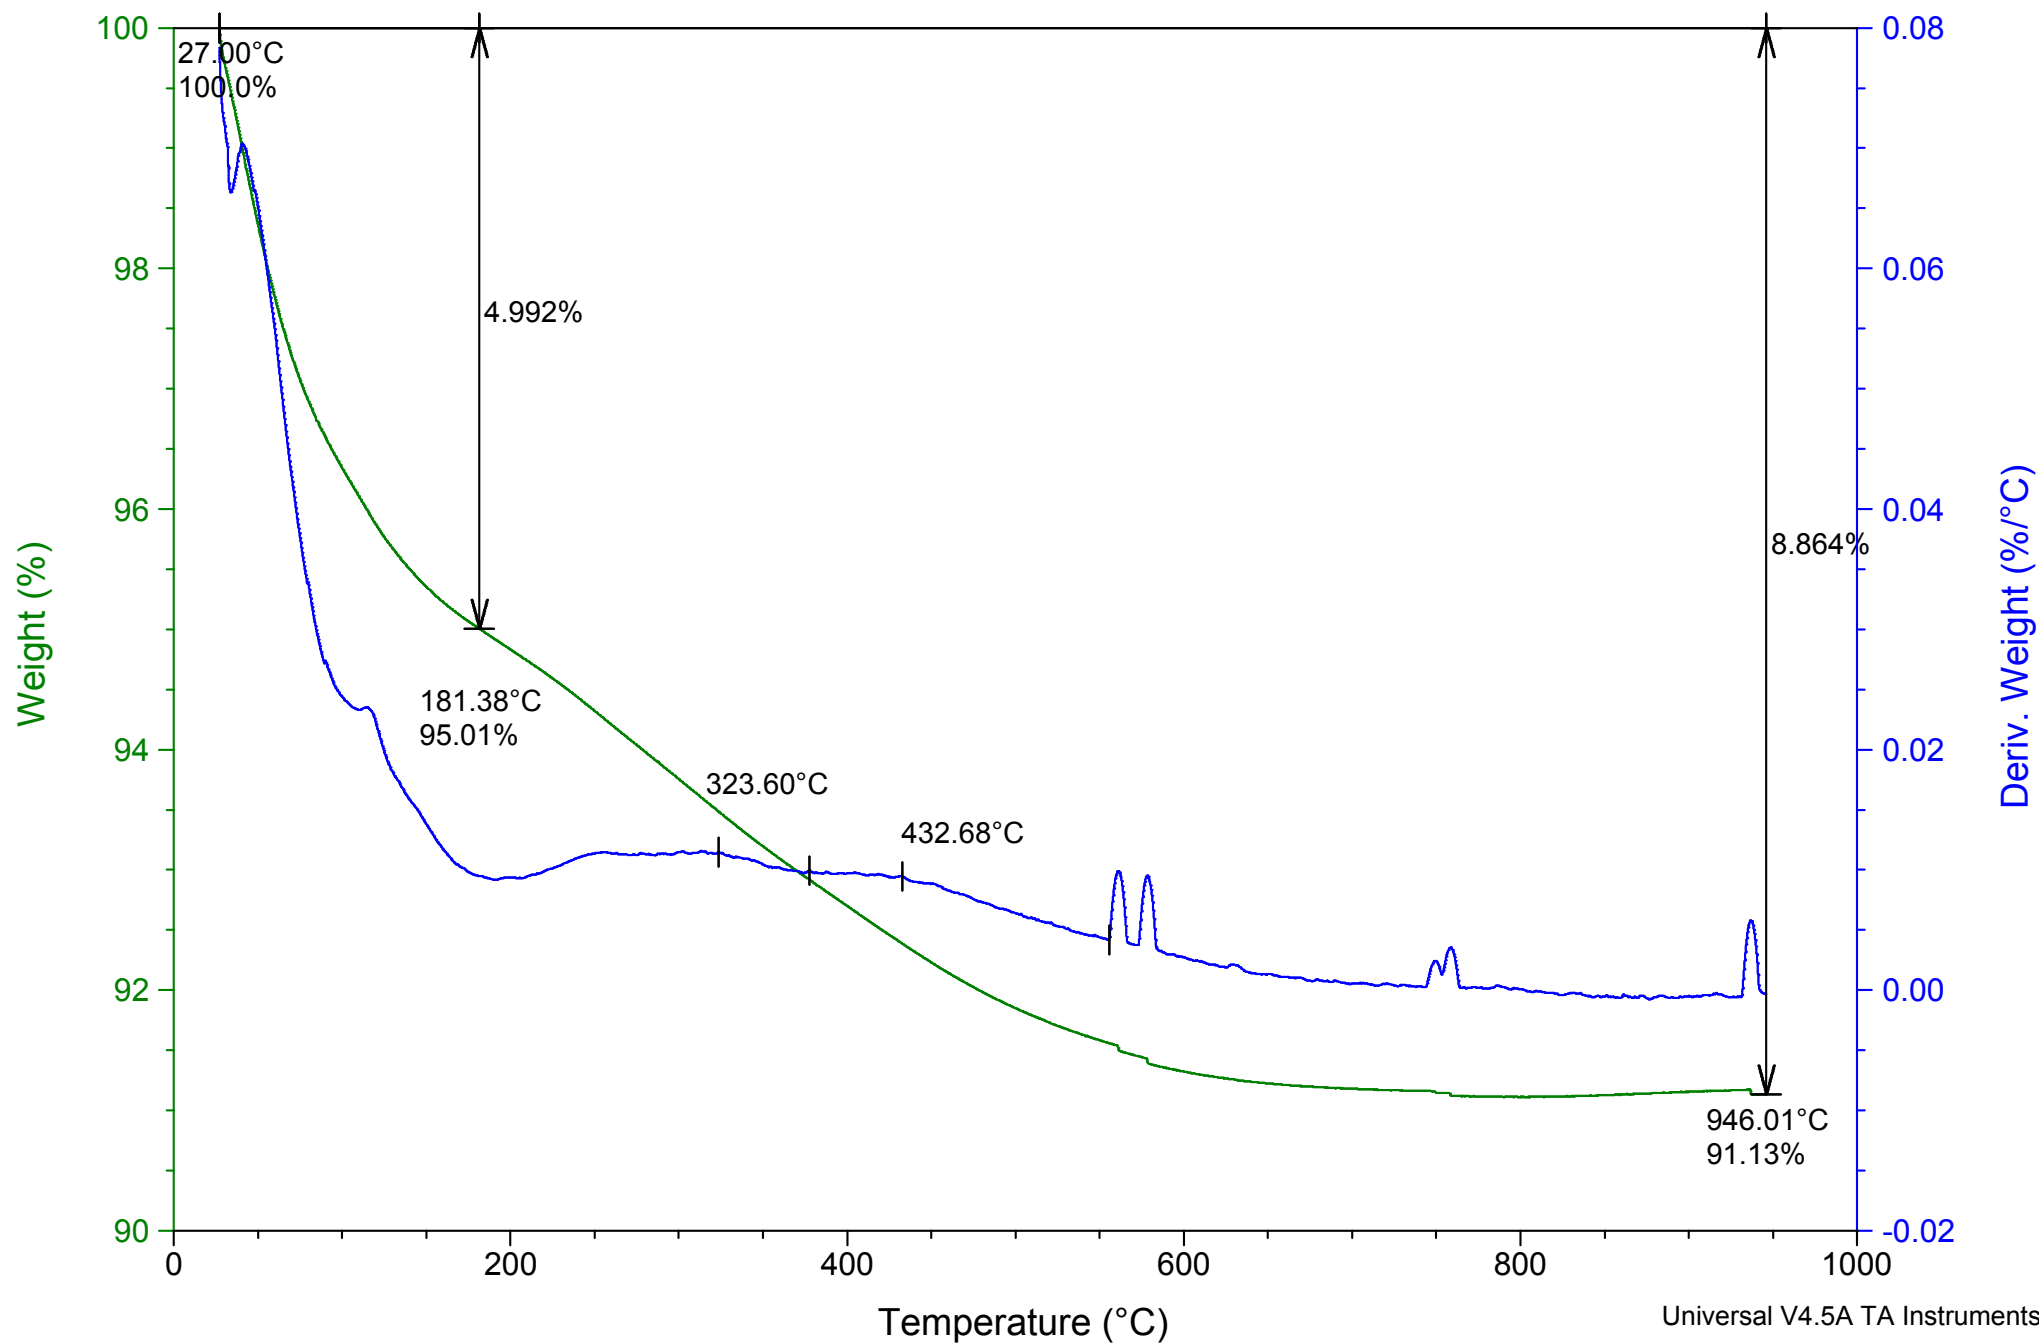

Supplement: Supplementary file 27 [file soil-10-813-2024-supplement.zip]
