# Supplementary material for: Soil organic matter interactions along the elevation gradient of the James Ross Island (Antarctica)
Source: Copernicus journal article supplement (doi:10.5194/soil-10-813-2024), 2024-11-19
Supplement: Supplementary file 29 [file soil-10-813-2024-supplement.zip]

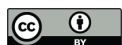

## *Supplement of*

# **Soil organic matter interactions along the elevation gradient of the James Ross Island (Antarctica)**

**Vítězslav Vlček et al.**

*Correspondence to:* Vítězslav Vlček ([vitezslav.vlcek@mendelu.cz](mailto:vitezslav.vlcek@mendelu.cz))

- soil-10-813-2024-supplement-title-page.pdf
- FC\_calibration curve for polyphenols.tif
- Vyhodnocení\_POLY\_a\_EXTR.xlsx
- plot 1a soil - TGA nitrogen.pdf
- plot 1a soil - TGA oxygen.pdf
- plot 1b soil - TGA nitrogen.pdf
- plot 1b soil - TGA oxygen.pdf
- plot 2a soil - TGA nitrogen.pdf
- plot 2a soil - TGA oxygen.pdf
- plot 2b soil - TGA nitrogen.pdf
- plot 2b soil - TGA oxygen.pdf
- plot 3a soil - TGA nitrogen.pdf
- plot 3a soil - TGA oxygen.pdf
- plot 3b soil - TGA nitrogen.pdf
- plot 3b soil - TGA oxygen.pdf
- plot 4 soil - TGA nitrogen.pdf
- plot 4 soil - TGA oxygen.pdf
- plot 5 soil - TGA nitrogen.pdf
- plot 5 soil - TGA oxygen.pdf
- plot 6 soil - TGA nitrogen.pdf

- plot 6 soil - TGA oxygen.pdf
- plot 7 soil - TGA nitrogen.pdf
- plot 7 soil - TGA oxygen.pdf
- plot 8 soil - TGA nitrogen.pdf
- plot 8 soil - TGA oxygen.pdf
- plot 9a soil - TGA nitrogen.pdf
- plot 9a soil - TGA oxygen.pdf
- plot 9b soil - TGA nitrogen.pdf
- plot 9b soil - TGA oxygen.pdf
- tea after decomposition plot 1b - TGA oxygen.pdf
- tea after decomposition plot 1b.pdf
- tea after decomposition plot 2a - TGA oxygen.pdf
- tea after decomposition plot 2a.pdf
- tea after decomposition plot 3a - TGA oxygen.pdf
- tea after decomposition plot 3a.pdf
- tea after decomposition plot 3b - TGA oxygen.pdf
- tea after decomposition plot 3b.pdf
- tea after decomposition plot 6 - TGA oxygen.pdf
- tea after decomposition plot 6.pdf
- tea after decomposition plot 7 - TGA oxygen.pdf
- tea after decomposition plot 7.pdf
- tea after decomposition plot 8 - TGA oxygen.pdf
- tea after decomposition plot 8.pdf
- tea after decomposition plot 9b - TGA oxygen.pdf
- tea after decomposition plot 9b.pdf
- tea before decomposition - TGA oxygen.pdf
- tea before decomposition.pdf

The copyright of individual parts of the supplement might differ from the article licence.
