# Supplementary material for: Soil organic matter interactions along the elevation gradient of the James Ross Island (Antarctica)
Source: Copernicus journal article supplement (doi:10.5194/soil-10-813-2024), 2024-11-19

Sample: 19 N  
Size: 15.7030 mg  
Method: 19 N  
Comment: 19 N

# TGA

File: C:\...\Enev\TG\A Mendelu\19-42\19 N.001

Run Date: 18 Nov 2020 09:51

Instrument: TGA Q5000 V3.17 Build 265

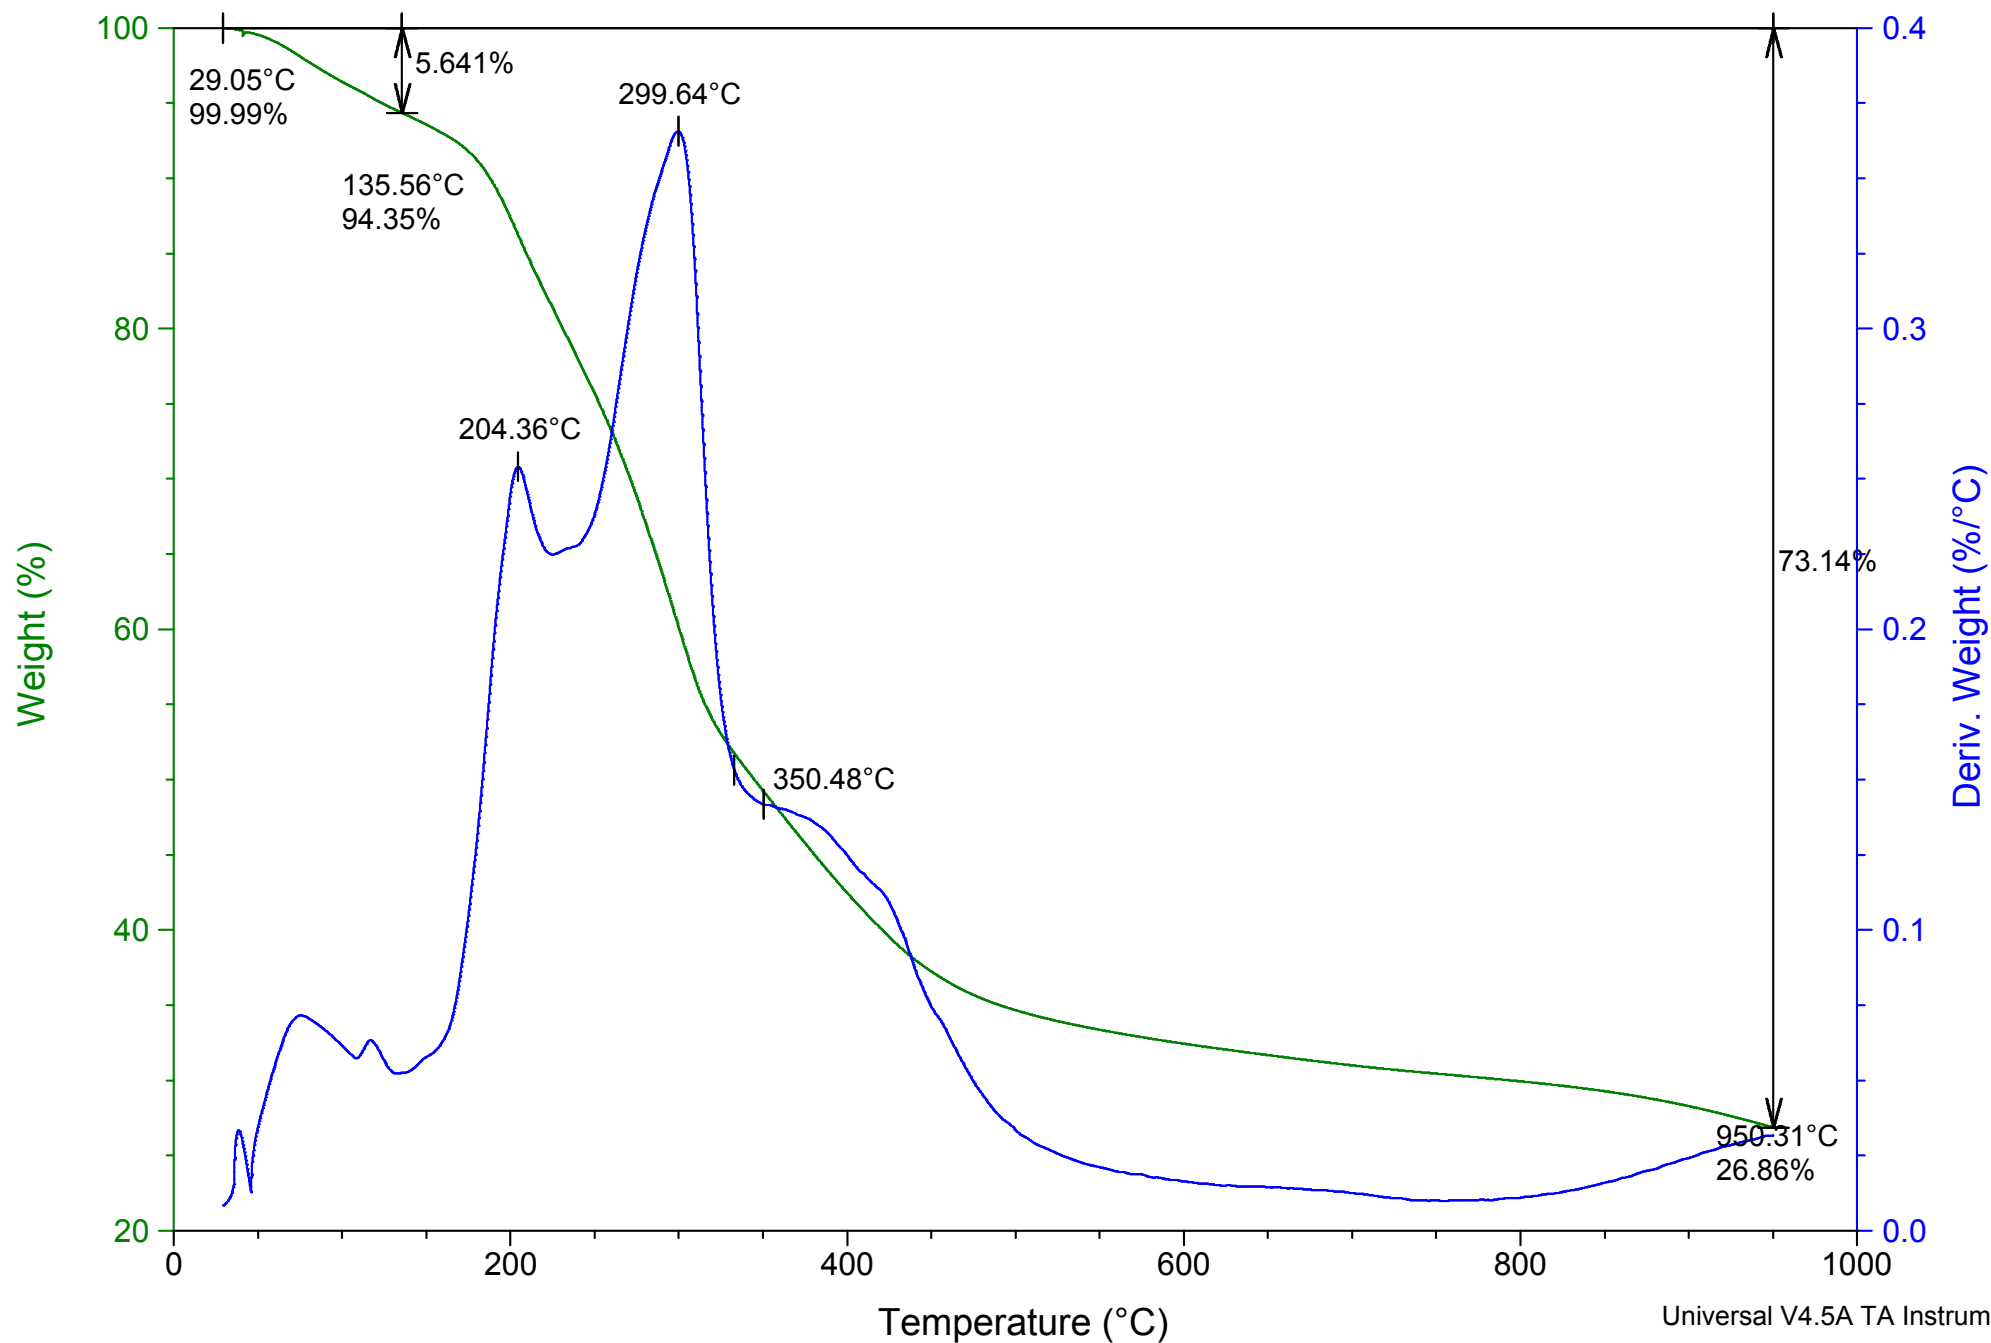

Supplement: Supplementary file 35 [file soil-10-813-2024-supplement.zip]
