# Supplementary material for: Soil organic matter interactions along the elevation gradient of the James Ross Island (Antarctica)
Source: Copernicus journal article supplement (doi:10.5194/soil-10-813-2024), 2024-11-19

Sample: 24 N  
Size: 25.9210 mg  
Method: 24 N  
Comment: 24 N

# TGA

File: C:\...\Enev\TGA\A Mendelu\19-42\24 N.002

Run Date: 24-Nov-2020 12:38

Instrument: TGA Q5000 V3.17 Build 265

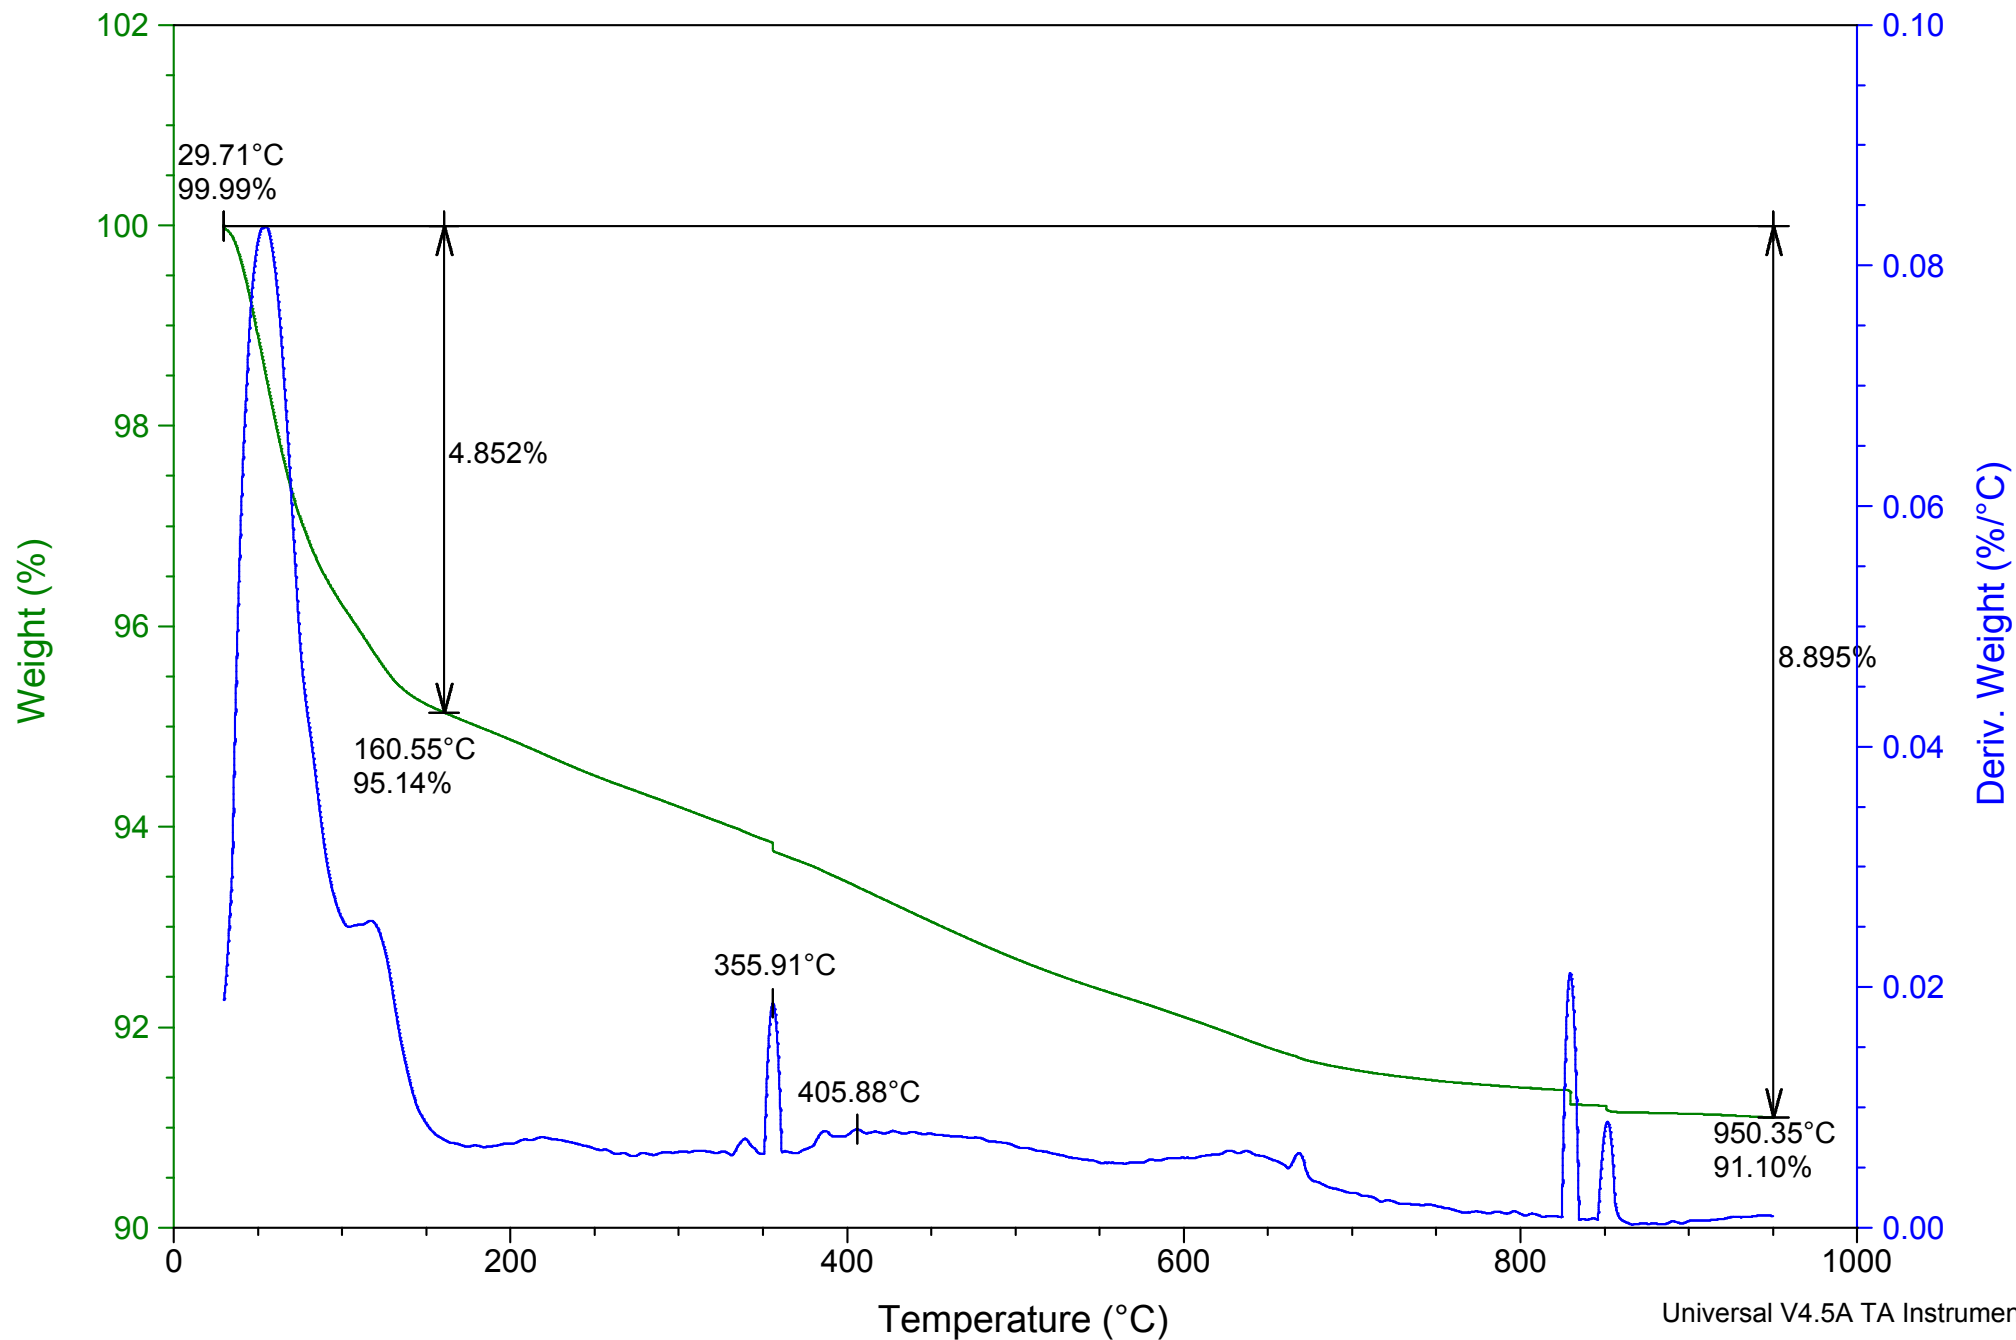

Supplement: Supplementary file 41 [file soil-10-813-2024-supplement.zip]
